# Supplementary material for: Neurofilament Light Chain Protein in Plasma and Extracellular Vesicles Is Associated with Minimal Hepatic Encephalopathy and Responses to Rifaximin Treatment in Cirrhotic Patients
Source: MDPI journal article supplement (doi:10.3390/ijms241914727), 2023-09-29
Supplement: s1 [file s1]

**Table S1.** Psychometric test results of control subjects and cirrhotic patients at baseline and follow-up according to response to rifaximin treatment.

| Psychometric test        | Control      | Cirrhotic patients |                                     | MHE patients treated with rifaximin |                                 |                                             |                              |
|--------------------------|--------------|--------------------|-------------------------------------|-------------------------------------|---------------------------------|---------------------------------------------|------------------------------|
|                          |              | NMHE               | MHE                                 | R0                                  | R6                              | NR0                                         | NR6                          |
| PHES                     | 1.1 ± 0.3    | -0.3 ± 0.2***      | -7.4 ± 0.5***/ $\alpha\alpha\alpha$ | -7.2 ± 0.9***/ $\alpha\alpha\alpha$ | -3.5 ± 0.6 $\delta\delta\delta$ | -7.7 ± 0.7***/ $\alpha\alpha\alpha$         | -7.7 ± 0.8 $\beta\beta\beta$ |
| <b>Stroop test</b>       |              |                    |                                     |                                     |                                 |                                             |                              |
| Congruent task           | 51.1 ± 2.1   | 45.3 ± 1.7         | 32.8 ± 1.5***/ $\alpha\alpha\alpha$ | 33.6 ± 2.6***/ $\alpha\alpha$       | 38.9 ± 2.8 $\delta$             | 33.3 ± 2.5***/ $\alpha\alpha$               | 31.8 ± 2.9 $\beta$           |
| Neutral task             | 51.3 ± 1.8   | 43.7 ± 1.5**       | 33.9 ± 1.1***/ $\alpha\alpha\alpha$ | 34.3 ± 2***/ $\alpha\alpha$         | 39.2 ± 2.3 $\delta$             | 32.8 ± 1.6***/ $\alpha\alpha\alpha$         | 31.4 ± 2.2 $\beta$           |
| Incongruent task         | 50.7 ± 2     | 43.9 ± 1.9*        | 34.8 ± 1.3***/ $\alpha\alpha\alpha$ | 33.3 ± 2.3***/ $\alpha\alpha$       | 40.4 ± 2.1 $\delta$             | 34 ± 2.1***/ $\alpha\alpha$                 | 36.1 ± 3.1                   |
| <b>d2 test</b>           |              |                    |                                     |                                     |                                 |                                             |                              |
| TR                       | 395.6 ± 15.7 | 330 ± 13.5**       | 257.4 ± 15.3***/ $\alpha\alpha$     | 283.1 ± 20.4***                     | 317.1 ± 19.3 $\delta$           | 214.1 ± 25.4***/ $\alpha\alpha\alpha/\beta$ | 240 ± 21.9 $\beta\beta$      |
| TA                       | 145.1 ± 8.8  | 122.5 ± 6.8        | 87.4 ± 6.4***/ $\alpha\alpha$       | 94.4 ± 7.7**                        | 114.4 ± 9 $\delta$              | 74.5 ± 12.9***/ $\alpha\alpha$              | 89.9 ± 10.8 $\beta$          |
| O                        | 15.2 ± 3.3   | 13.9 ± 2.1         | 22.1 ± 4                            | 26.4 ± 7.2                          | 18.5 ± 5.7                      | 16.3 ± 4                                    | 11.6 ± 2.8                   |
| C                        | 2.5 ± 0.9    | 4.2 ± 1.4          | 8.3 ± 2.4                           | 9.2 ± 4.1                           | 5.1 ± 2.8                       | 11 ± 4.1                                    | 5.5 ± 2.4                    |
| TOT                      | 372.2 ± 18.7 | 304.3 ± 15.2*      | 227.9 ± 14.9***/ $\alpha\alpha$     | 247.5 ± 18.7***                     | 293.7 ± 19.4 $\delta$           | 189.2 ± 27.9***/ $\alpha\alpha/\beta$       | 222.9 ± 24.8 $\beta$         |
| CON                      | 145.6 ± 7.1  | 119 ± 7.3          | 79.1 ± 7.5***/ $\alpha\alpha\alpha$ | 85.2 ± 10.5***/ $\alpha$            | 109.3 ± 10.4 $\delta$           | 63.5 ± 14.3***/ $\alpha\alpha\alpha$        | 84.4 ± 12.4                  |
| <b>Oral SDMT Test</b>    |              |                    |                                     |                                     |                                 |                                             |                              |
| Correct pairing          | 51 ± 1.5     | 38.8 ± 1.6***      | 23.5 ± 1.8***/ $\alpha\alpha\alpha$ | 26.9 ± 3.1***/ $\alpha\alpha\alpha$ | 33.6 ± 2.4 $\delta\delta$       | 18.9 ± 2.4***/ $\alpha\alpha\alpha/\beta$   | 19.8 ± 2.4 $\beta\beta\beta$ |
| Scaled score             | 13.3 ± 0.4   | 10.2 ± 0.4***      | 7.3 ± 0.4***/ $\alpha\alpha\alpha$  | 7.3 ± 0.8***/ $\alpha\alpha\alpha$  | 9.0 ± 0.5 $\delta\delta$        | 7.0 ± 0.6***/ $\alpha\alpha\alpha$          | 7.0 ± 0.6 $\beta\beta$       |
| Errors pairing           | 0.5 ± 0.2    | 1.3 ± 0.3*         | 1.5 ± 0.3**                         | 1.3 ± 0.3*                          | 1.8 ± 0.4                       | 1.9 ± 0.6                                   | 1.3 ± 0.4                    |
| Total pairing            | 47.2 ± 4.3   | 40.1 ± 1.6         | 25 ± 1.7***/ $\alpha\alpha\alpha$   | 28.2 ± 3.1***/ $\alpha\alpha$       | 35.4 ± 2.3 $\delta\delta$       | 20.8 ± 2.5***/ $\alpha\alpha\alpha/\beta$   | 21.1 ± 2.4 $\beta\beta\beta$ |
| <b>Digit span test</b>   |              |                    |                                     |                                     |                                 |                                             |                              |
| Digits forward           | 9.9 ± 0.6    | 7.9 ± 0.4**        | 6.6 ± 0.3***/ $\alpha$              | 6.8 ± 0.3***                        | 7.4 ± 0.6                       | 6 ± 0.5***/ $\alpha$                        | 6.7 ± 0.5                    |
| Digits backward          | 6.8 ± 0.5    | 4.5 ± 0.3***       | 3.9 ± 0.3***                        | 3.9 ± 0.5***                        | 5.2 ± 0.7 $\delta$              | 3.6 ± 0.3***                                | 4 ± 0.4                      |
| Digits total             | 16.7 ± 0.9   | 12.4 ± 0.5***      | 10.5 ± 0.6***                       | 10.8 ± 0.7***                       | 12.6 ± 1.3 $\delta$             | 9.6 ± 0.7***/ $\alpha$                      | 10.7 ± 0.8 $\delta$          |
| Number-letter test       | 9.1 ± 0.6    | 7.4 ± 0.5          | 5.4 ± 0.5***/ $\alpha\alpha$        | 6.1 ± 0.8**                         | 6.2 ± 0.9                       | 4.4 ± 0.7***/ $\alpha\alpha$                | 4.6 ± 0.7                    |
| <b>Coordination test</b> |              |                    |                                     |                                     |                                 |                                             |                              |
| Bimanual                 | 2.1 ± 0.1    | 2.3 ± 0.1*         | 3.5 ± 0.2***/ $\alpha\alpha\alpha$  | 3.1 ± 0.2**/ $\alpha\alpha$         | 2.9 ± 0.2                       | 3.9 ± 0.5**/ $\alpha$                       | 3.6 ± 0.3 $\beta$            |
| Visuo-motor              | 2.4 ± 0.1    | 2.8 ± 0.1***       | 4.0 ± 0.2***/ $\alpha\alpha\alpha$  | 3.5 ± 0.2***/ $\alpha\alpha$        | 3.4 ± 0.2                       | 4.4 ± 0.4***/ $\alpha\alpha/\beta$          | 4.4 ± 0.4 $\beta$            |

Values are the mean ± SEM. Values significantly different from the control are indicated by an asterisk (\*), from NMHE patients by  $\alpha$ , from responder patients by  $\beta$  and from patients before treatment by  $\delta$  (\*/ $\alpha/\beta/\delta$  p<0.05; \*\*/ $\alpha\alpha/\beta\beta/\delta\delta$  p<0.01; \*\*\*/ $\alpha\alpha\alpha/\beta\beta\beta/\delta\delta\delta$  p<0.001). NMHE, patients without minimal hepatic encephalopathy; MHE, patients with minimal hepatic encephalopathy; R0/R6, responder patients before and after treatment; NR0/NR6, non-responder patients before and after treatment; PHES, psychometric hepatic encephalopathy score; TR, total responses; TA, total right answer; O, omission errors; C, commission errors; TOT, effectiveness index; CON, concentration index; SDMT, symbol digit modalities test (oral version).

**Table S2.** Plasma inflammatory parameters of control subjects and cirrhotic patients at baseline and follow-up according to their response to rifaximin treatment.

| Inflammatory parameters | Control      | Cirrhotic patients |                    | MHE patients treated with rifaximin |                        |                |               |
|-------------------------|--------------|--------------------|--------------------|-------------------------------------|------------------------|----------------|---------------|
|                         |              | NMHE               | MHE                | R0                                  | R6                     | NR0            | NR6           |
| IL-6 <sup>a</sup>       | 1.3 ± 0.2    | 2.4 ± 0.3          | 2.9 ± 0.6          | 2.9 ± 0.5**                         | 2.0 ± 0.4              | 3.2 ± 1.4      | 2.2 ± 1.4     |
| IL-18 <sup>a</sup>      | 197.7 ± 33.2 | 387.4 ± 36**       | 445 ± 72.5**       | 441.1 ± 83.3**                      | 493.3 ± 91.9           | 503.1 ± 147.7  | 641.5 ± 289.6 |
| IL-13 <sup>a</sup>      | 1.4 ± 0.9    | 3.8 ± 1.6          | 3.3 ± 0.8          | 3.8 ± 1.6                           | 3.1 ± 1.6              | 1.9 ± 0.4      | 1.4 ± 0.3     |
| CCL20 <sup>a</sup>      | 6.7 ± 1.4    | 20.1 ± 2.9**       | 39.3 ± 8.9**       | 32 ± 7.3*                           | 38.4 ± 8.2             | 34.7 ± 13.8    | 23.5 ± 8.6    |
| IL-22 <sup>a</sup>      | 27.5 ± 2.9   | 34.8 ± 4.4         | 82.8 ± 15.1**/α    | 77.5 ± 17.1*                        | 91.5 ± 16.1            | 101.2 ± 33.1   | 87.2 ± 17.5   |
| TGF-β <sup>b</sup>      | 115.2 ± 24.9 | 96.5 ± 17.8        | 111.5 ± 17.1       | 114.0 ± 30.8                        | 100.3 ± 44.8           | 117.2 ± 21.2   | 44.4 ± 15     |
| CX3CL1 <sup>a</sup>     | 305.2 ± 64.4 | 335.2 ± 30         | 716.8 ± 57.4**/ααα | 750.7 ± 70.6**/ααα                  | 726.6 ± 72             | 715 ± 107.5*/α | 733.1 ± 121.6 |
| CCL2 <sup>a</sup>       | 11.6 ± 2.4   | 11.5 ± 2.1         | 54.4 ± 15.4*/α     | 65.1 ± 27.3                         | 8.7 ± 1.7 <sup>δ</sup> | 51.7 ± 22.7    | 13.1 ± 2.9    |

Values are the mean ± SEM. <sup>a</sup> pg/mL; <sup>b</sup> ng/mL. Values significantly different from control are indicated by an asterisk (\*), from NMHE patients by <sup>α</sup> and from patients before treatment by <sup>δ</sup> (\*/\*α/δ p<0.05; \*\* p<0.01; \*\*\*/ααα p<0.001). NMHE, patients without minimal hepatic encephalopathy; MHE, patients with minimal hepatic encephalopathy; R0/R6, responders before and after treatment; NR0/NR6, non-responders before and after treatment; IL, interleukin; CCL20, C-C Motif Chemokine Ligand 20; TGF-β, transforming growth factor-β; CX3CL1, C-X3-C motif chemokine ligand 1; CCL2, C-C motif chemokine ligand 2.

**Table S3.** Plasma NfL levels in control subjects and cirrhotic patients according to cirrhosis etiology.

|                    | Control    | Cirrhotic patients |                         |            |
|--------------------|------------|--------------------|-------------------------|------------|
|                    |            | HBV/HCV            | Alcohol                 | NASH       |
| <b>Total group</b> | 11.6 ± 0.5 | 10.5 ± 0.9         | 15.2 ± 1.4*/ε           | 19.5 ± 4.1 |
| <b>NMHE</b>        | -          | 9.2 ± 0.8          | 12.9 ± 1.0 <sup>ε</sup> | 11.7 ± 4.4 |
| <b>MHE</b>         | -          | 11.4 ± 1.4         | 17.5 ± 2.5*/ε           | 21.4 ± 4.9 |

Values are expressed in pg/ml and are the mean ± SEM. Values significantly different from the control are indicated by an asterisk (\*) and from HBV/HCV etiology patients by <sup>ε</sup> (\*/\*ε p<0.05). PHES, psychometric hepatic encephalopathy score; NMHE, patients without minimal hepatic encephalopathy; MHE, patients with minimal hepatic encephalopathy; HBV, hepatitis B virus; HCV, hepatitis C virus; NASH, non-alcoholic steatohepatitis.
